# Supplementary material for: Carbon-coated SnO2 riveted on a reduced graphene oxide composite (C@SnO2/RGO) as an anode material for lithium-ion batteries
Source: Royal Society of Chemistry journal article supplement (doi:10.1039/d0ra10912f), 2021-01-01
Supplement: d0ra10912f1.pdf [file d0ra10912f1.pdf]

## Supporting information

### **Carbon-Coated SnO<sub>2</sub> riveted on Reduced Graphene Oxide composite (C@SnO<sub>2</sub>/RGO) as an anode material for lithium ion batteries**

Yao Dai<sup>a, e</sup>, Fu Li<sup>d, e</sup>, Yuan-Xiang Fu<sup>b, e</sup>, Dong-Chuan Mo<sup>c, e</sup>, Shu-Shen Lyu<sup>c, e\*</sup>

<sup>a</sup> School of materials science and engineering, Sun Yat-sen University, Guangzhou  
510275, P. R. China.

<sup>b</sup> School of Chemical Engineering & Guizhou provincial key laboratory of energy  
chemistry, Guizhou Institute of Technology, Guiyang, 550003, PR China.

<sup>c</sup> School of materials, Sun Yat-sen University, Guangzhou 510275, P. R. China.

<sup>d</sup> School of Chemical Engineering and Technology, Sun Yat-sen University,  
Guangzhou, 510275, China

<sup>e</sup> Guangdong Engineering Technology Research Centre for Advanced Thermal  
Control Material and System Integration (ATCMSI), Sun Yat-sen University,  
Guangzhou, 510275, P. R. China.

\*Corresponding author: E-mail: lvshsh@mail.sysu.edu.cn (S-S, Lyu)

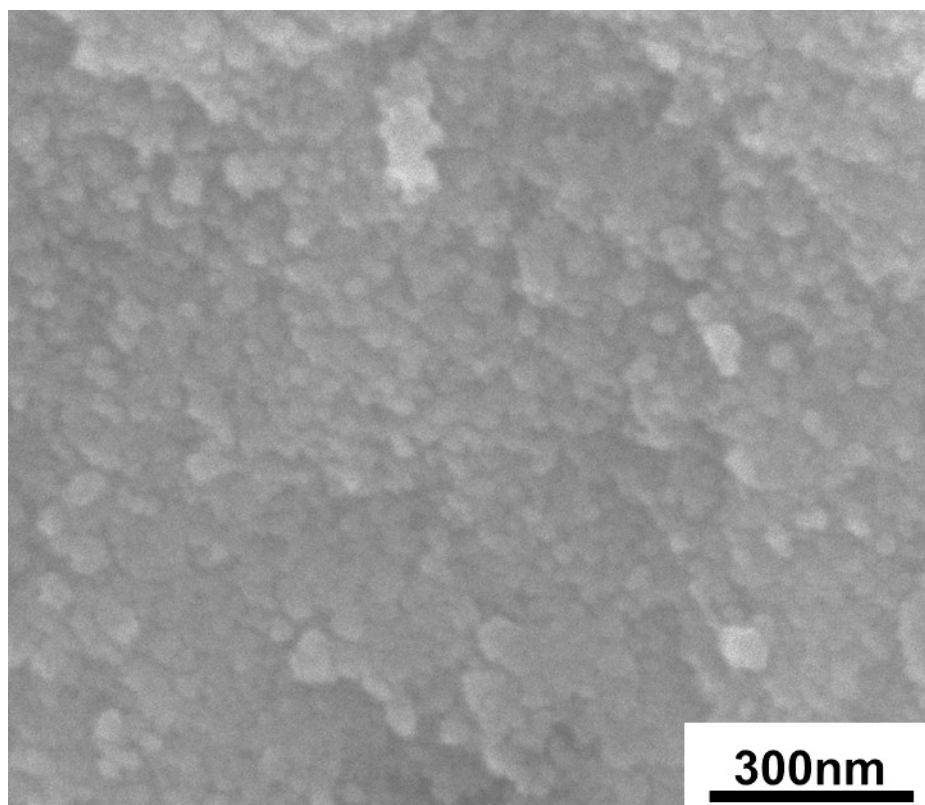

Fig.S1 SEM image of pure SnO<sub>2</sub> particles

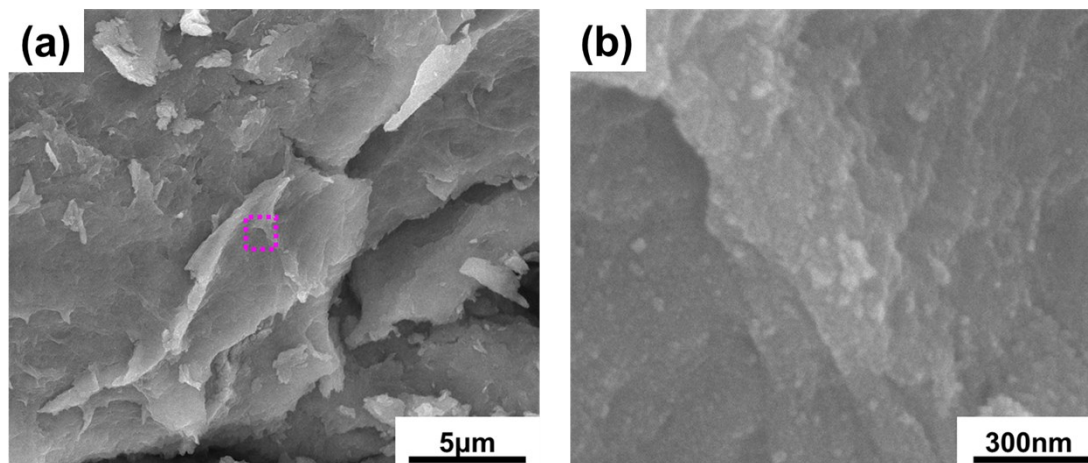

Fig.S2 SEM image of SnO<sub>2</sub>/RGO-90 (a), and magnified image (b).

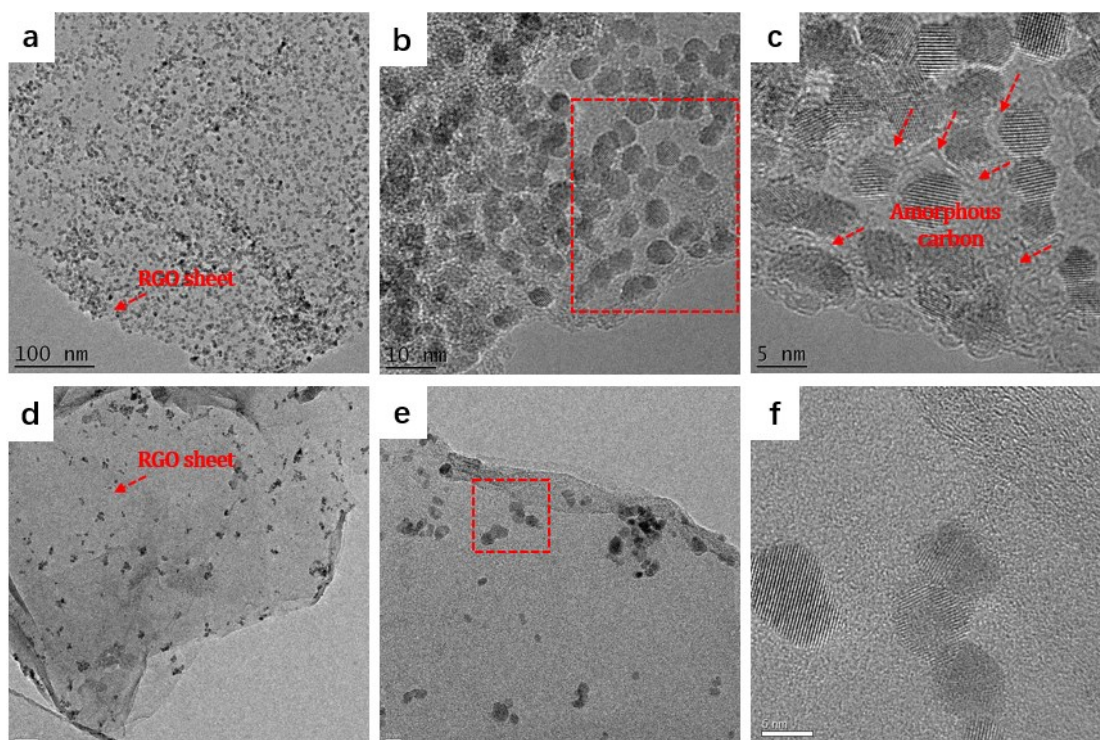

Fig.S3 TEM images of C@SnO<sub>2</sub>/RGO-90 (a-c) and SnO<sub>2</sub>/RGO-90 (d-f) composite.

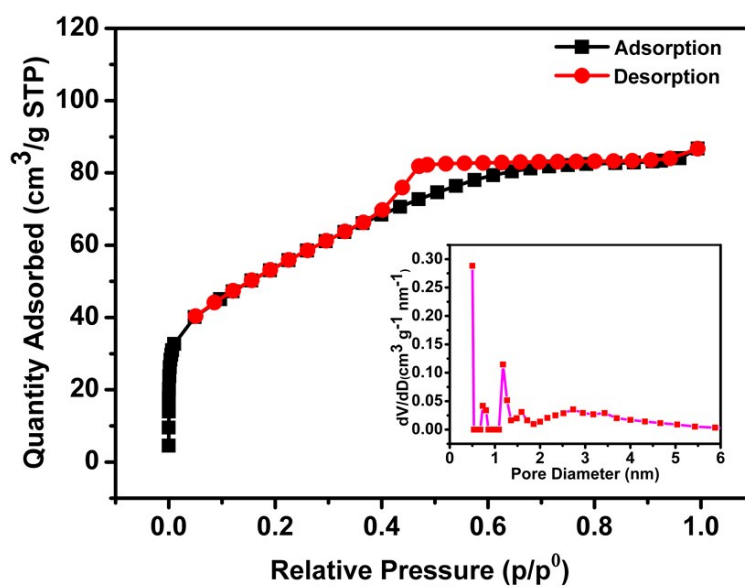

Fig.S4 Nitrogen (77 K) adsorption/desorption isotherms and Pore size distribution of the C@SnO<sub>2</sub>/RGO-90 specimens

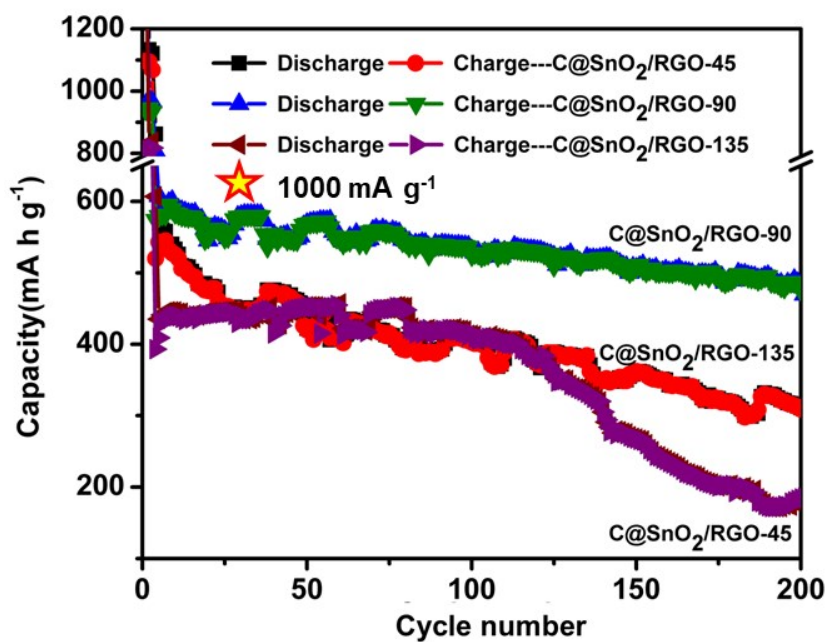

Fig.S5 Cycling performance of C@SnO<sub>2</sub>/RGO-45, C@SnO<sub>2</sub>/RGO-90 and C@SnO<sub>2</sub>/RGO-135 at 1000 mA g<sup>-1</sup> after 200 cycles.

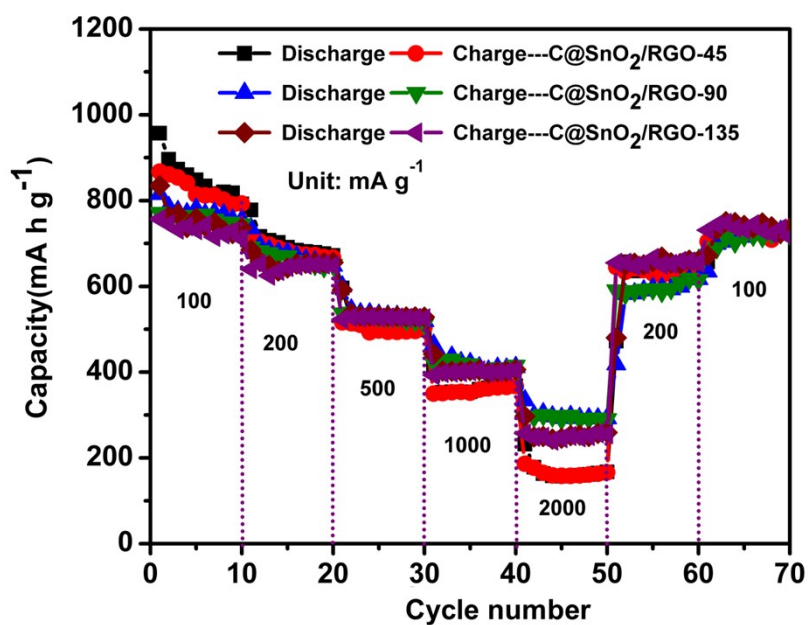

Fig.S6 Rate capacities of C@SnO<sub>2</sub>/RGO-45, C@SnO<sub>2</sub>/RGO-90 and C@SnO<sub>2</sub>/RGO-

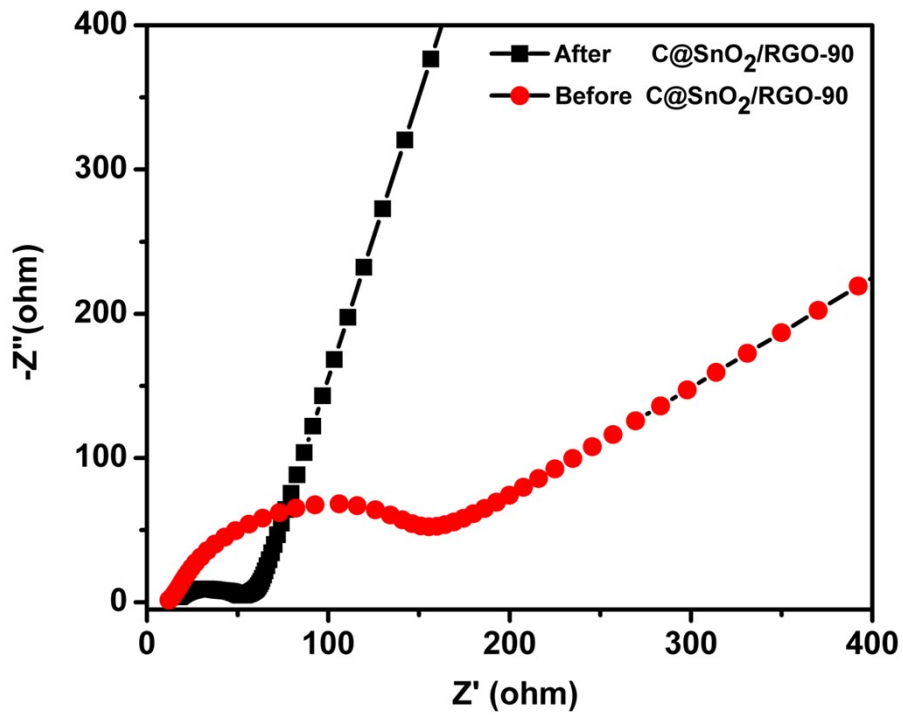

Fig.S7. The EIS curves of C@SnO<sub>2</sub>/RGO-90 before and after 200 cycles at 1000 mA

g<sup>-1</sup>.

TableS1 Physicochemical properties calculated from EIS spectra (in Fig.S7)

| Samples                           | R <sub>s</sub> (Ω) | R <sub>ct</sub> (Ω) |
|-----------------------------------|--------------------|---------------------|
| C@SnO <sub>2</sub> /RGO-90-before | 60.89              | 34.81               |
| C@SnO <sub>2</sub> /RGO-90-After  | 5.092              | 29                  |
